# Supplementary material for: Modifications of the metal and support during the deactivation and regeneration of Au/C catalysts for the hydrochlorination of acetylene
Source: Royal Society of Chemistry journal article supplement (doi:10.1039/c2cy20478a), 2012-08-07
Supplement: c2cy20478a.pdf [file c2cy20478a.pdf]

Electronic Supplementary Information for

**Modifications of the metal and support during the deactivation and regeneration of Au/C catalysts for the hydrochlorination of acetylene**

Marco Conte,<sup>\*a</sup> Catherine J. Davies,<sup>a</sup> David J. Morgan,<sup>a</sup> Thomas E. Davies,<sup>a</sup>  
Albert F. Carley,<sup>a</sup> Peter Johnston,<sup>b</sup> and Graham J. Hutchings <sup>\*a</sup>

<sup>a</sup> Cardiff Catalysis Institute, School of Chemistry, Cardiff University,  
Cardiff, CF10 3AT, UK

<sup>b</sup> Johnson Matthey Catalysts, Orchard Road, Royston, Herts, SG8 5HE, UK

\*E-mail: [ConteM1@cardiff.ac.uk](mailto:ConteM1@cardiff.ac.uk), [Hutch@cardiff.ac.uk](mailto:Hutch@cardiff.ac.uk)

**Table of contents:**

**Fig. S1.** Schematic of the TPR integration algorithm.

**Fig. S2.** Details of the TPR thermograms in the region 180-350 °C (Au<sup>3+</sup> reduction).

**Figs. S3 and S4.** SEM images of the Au/C catalyst 1% wt.

**Fig. S5.** XRPD patterns of the Au/C catalyst 1% wt impregnated in *aqua regia* dried at different temperatures.

**Fig. S6.** Acetylene conversion by using catalysts impregnated in *aqua regia* drying the catalysts at different temperatures.

**Fig. S7.** Conversion after 5 h and Au<sup>3+</sup> amount (in mmol) for Au/C catalysts containing different amount of Au<sup>3+</sup>.

**Fig. S8.** Acetylene conversion over Au/C catalysts dried at 140 °C using different HNO<sub>3</sub> volume fraction in the HCl/HNO<sub>3</sub> preparation mixture from 0 to 0.5 HNO<sub>3</sub> volume fraction.

**Fig. S9.** XPS spectrum and simulation for a fresh Au/C catalyst.

**Fig. S10.** XPS spectrum and simulation for a reduced Au/C catalyst.

**Fig. S11.** XPS spectrum and simulation for Au/C catalyst after first re-oxidation.

**Fig. S12.** XPS spectrum and simulation for Au/C catalyst after second reduction.

**Fig. S13.** XPS spectrum and simulation for Au/C catalyst after second re-oxidation.

**Fig. S14.** XPS spectrum and simulation for Au/C catalyst after third reduction.

**Fig. S15.** XPS spectrum and simulation for Au/C catalyst after third re-oxidation.

**Fig. S16.** N<sub>2</sub> adsorption isotherms for the untreated carbon, fresh Au/C catalyst and oxidised Au/C catalyst.

**Fig. S17.** Pore size distribution of the untreated carbon, fresh Au/C catalyst and oxidised Au/C catalyst.

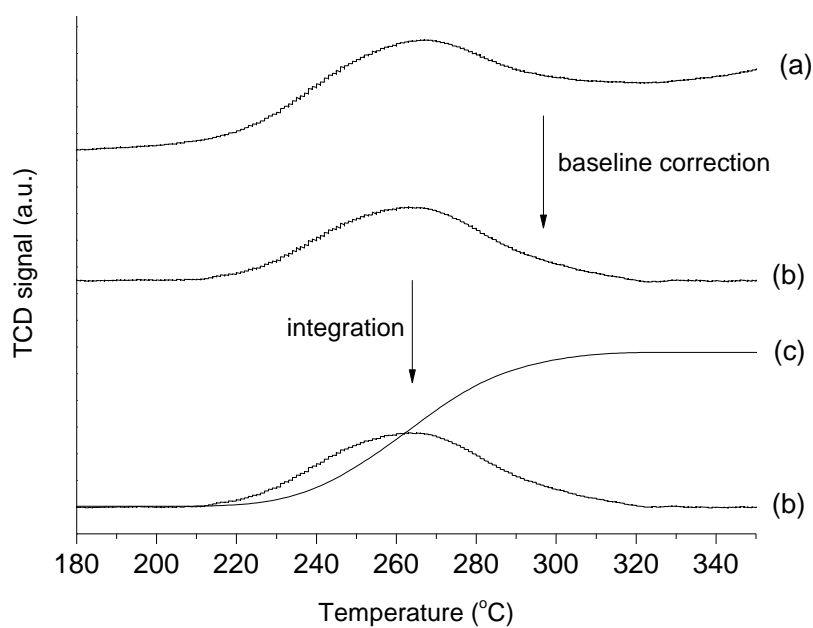

**Fig. S1.** Procedure for the TPR area peaks determination. The Au<sup>3+</sup> peak (a) was subject to baseline correction (b). A cumulative area counts in the interval 180 to 350 °C (c) was carried out.

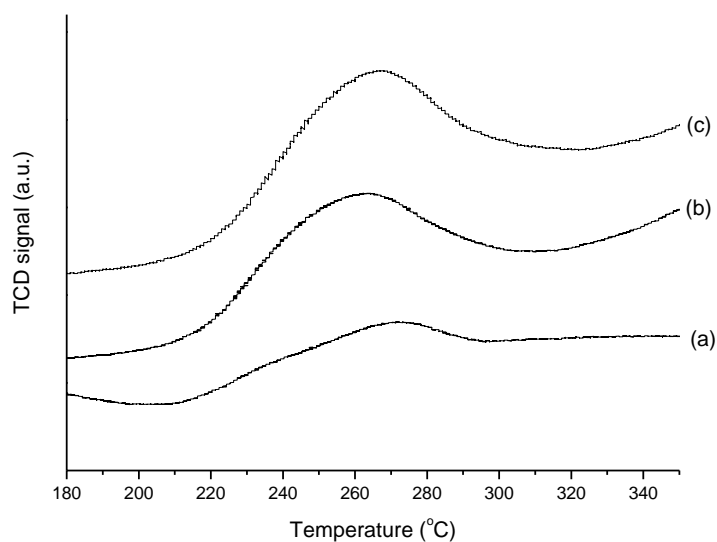

**Fig. S2.** Details of the TPR thermograms in the region 180-350 °C ( $\text{Au}^{3+}$  reduction).  
(a) fresh catalyst, (b) first catalyst oxidation, and (c) second catalyst oxidation.

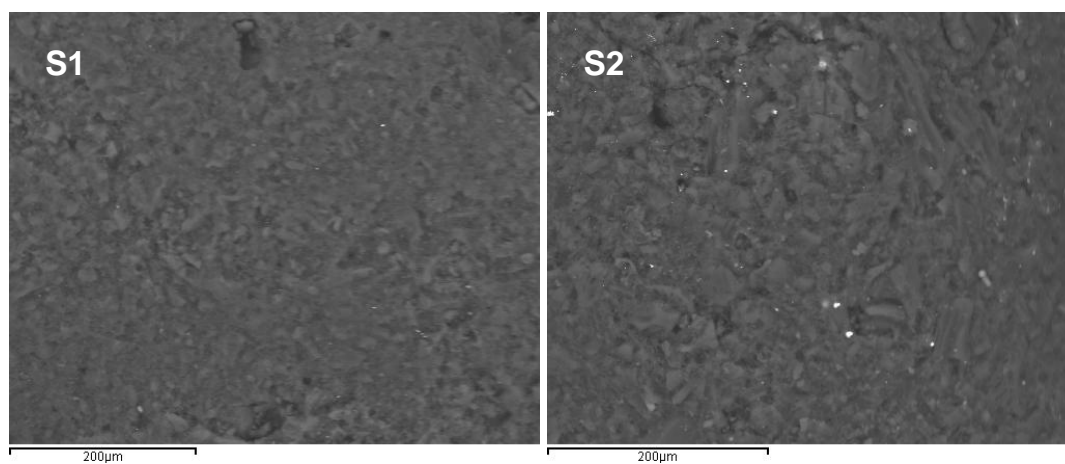

**Figs. S3 and S4.** SEM images of the Au/C catalyst 1% wt.

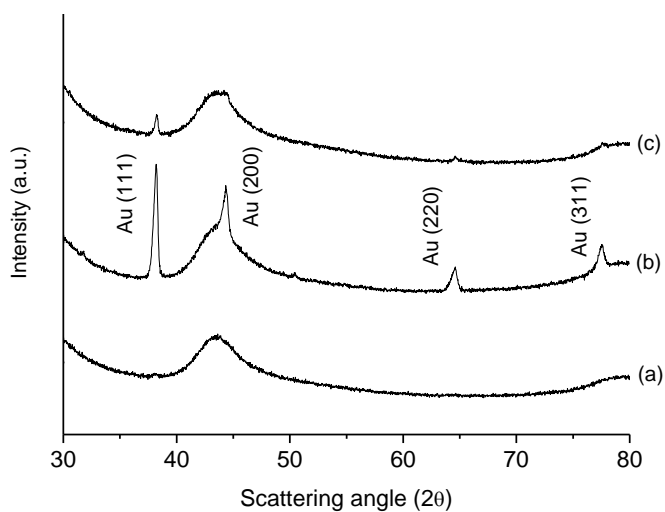

**Fig. S5.** XRPD patterns of the Au/C catalyst 1% wt impregnated in *aqua regia* dried at (a) 110 °C, (b) 140 °C and (c) 180 °C.

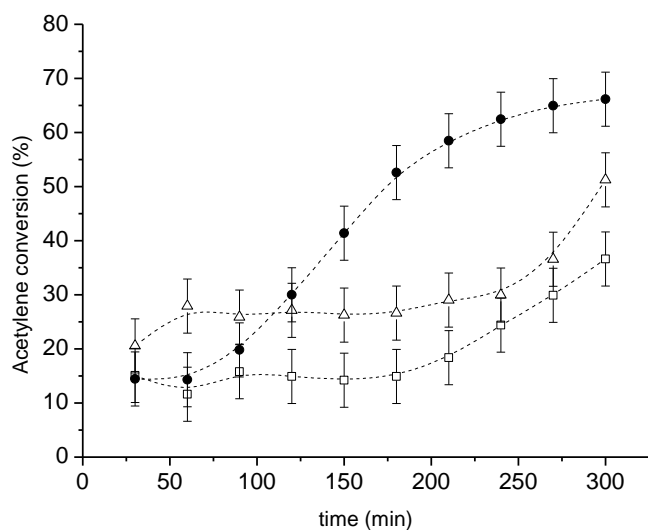

**Fig. S6.** Acetylene conversion by using catalysts impregnated in *aqua regia* drying the catalysts at different temperatures of: (□) 110, (●) 140 and (Δ) 180 °C.

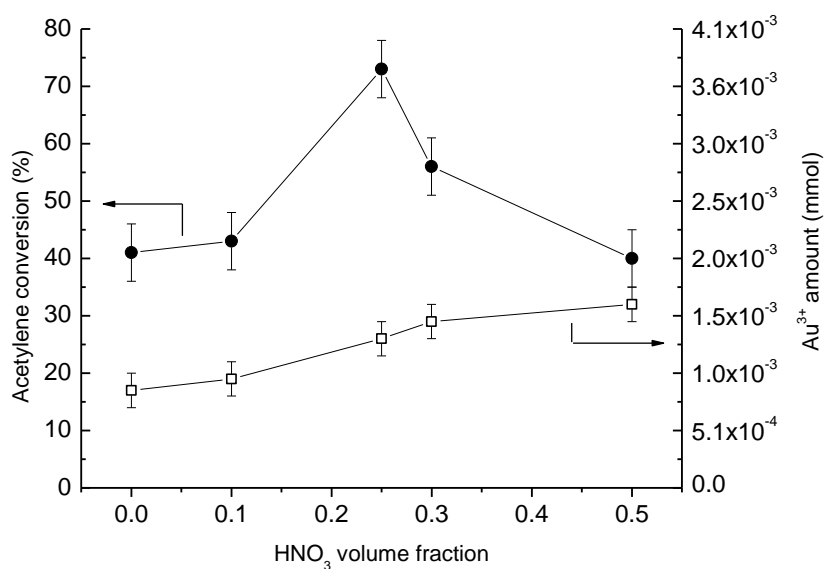

**Fig. S7.** Conversion (●) after 5 h and Au<sup>3+</sup> (□) amount (in mmol) for Au/C catalysts containing different amount of Au<sup>3+</sup>. The catalysts were obtained from impregnating solutions containing different HNO<sub>3</sub> volume fraction in the HCl/HNO<sub>3</sub> mixture.

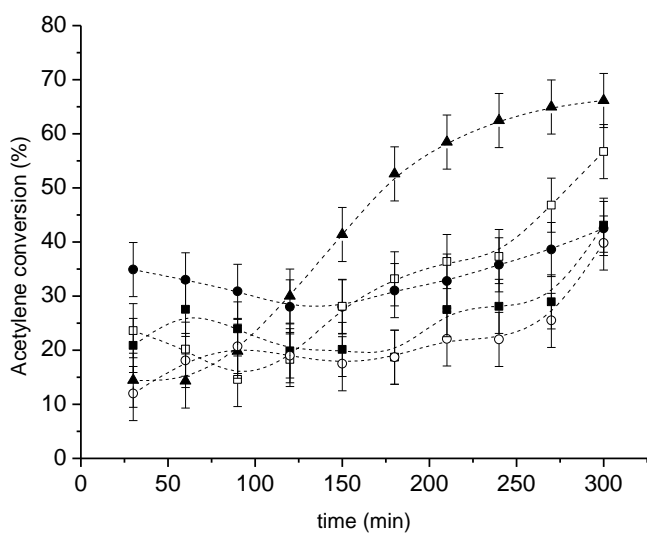

**Fig. S8.** Acetylene conversion over Au/C catalysts dried at 140 °C using different HNO<sub>3</sub> volume fraction in the HCl/HNO<sub>3</sub> preparation mixture: (■) 0, (●) 0.1, (▲) 0.25, (□) 0.33 and (○) 0.5 HNO<sub>3</sub> volume fraction.

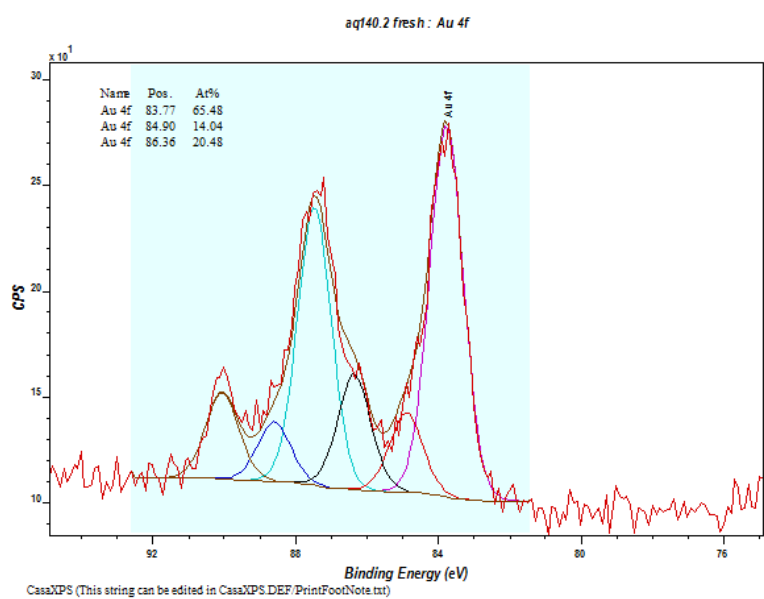

**Fig. S9.** XPS spectrum and simulation for a fresh Au/C catalyst.

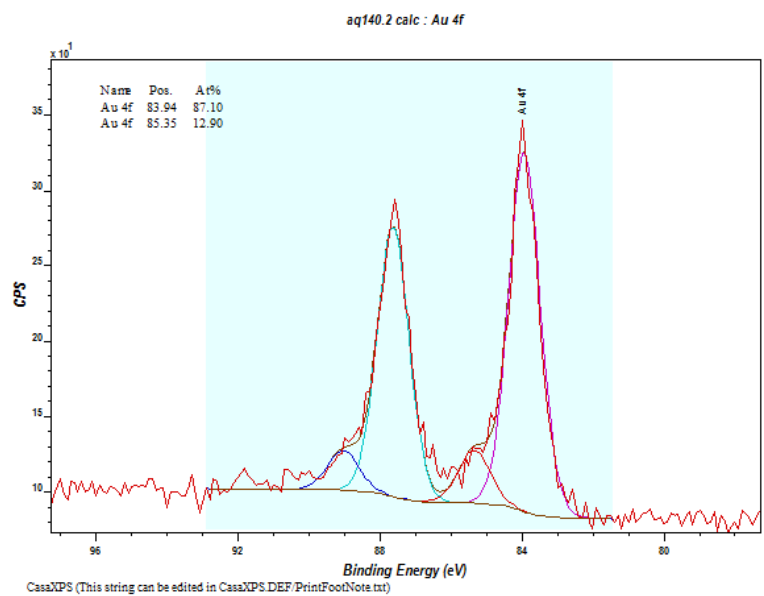

**Fig. S10.** XPS spectrum and simulation for a reduced Au/C catalyst.

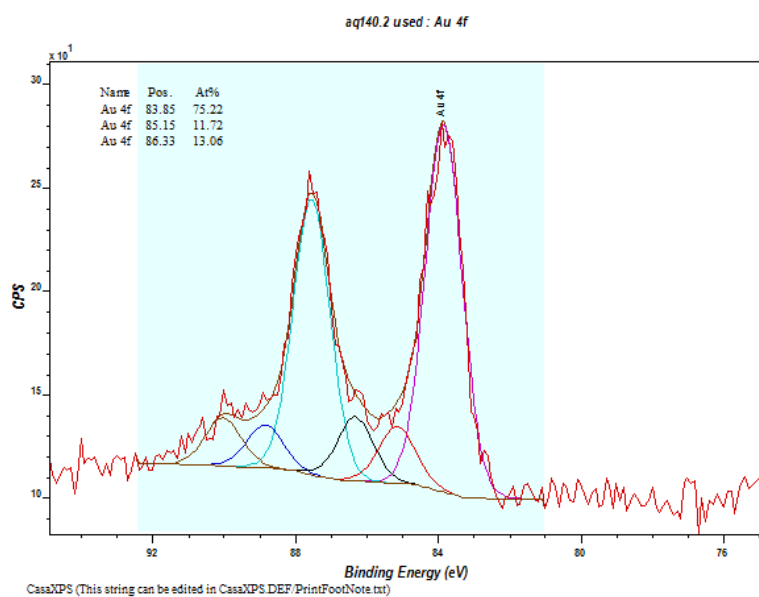

**Fig. S11.** XPS spectrum and simulation for Au/C catalyst after first re-oxidation.

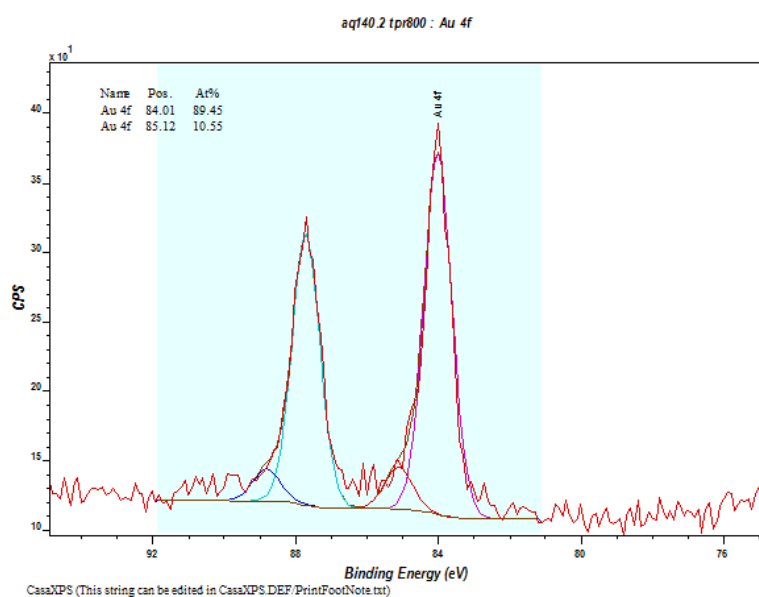

**Fig. S12.** XPS spectrum and simulation for Au/C catalyst after second reduction.

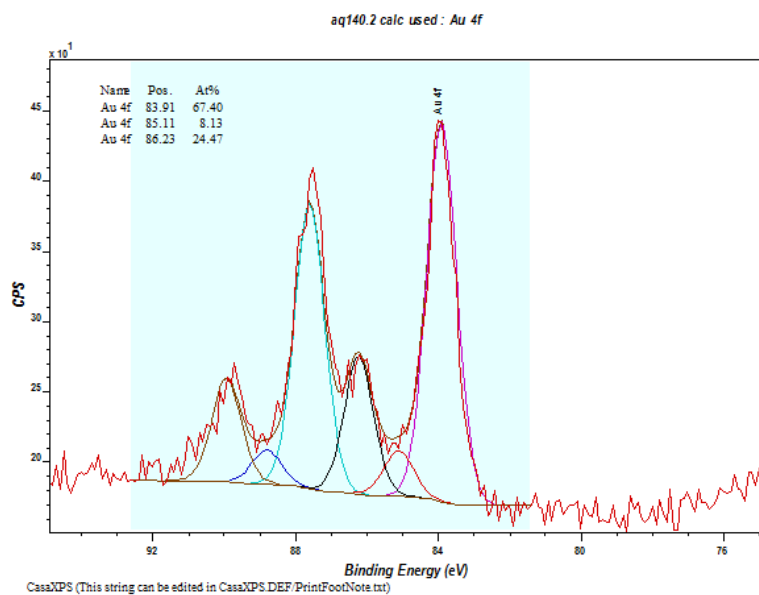

**Fig. S13.** XPS spectrum and simulation for Au/C catalyst after second re-oxidation.

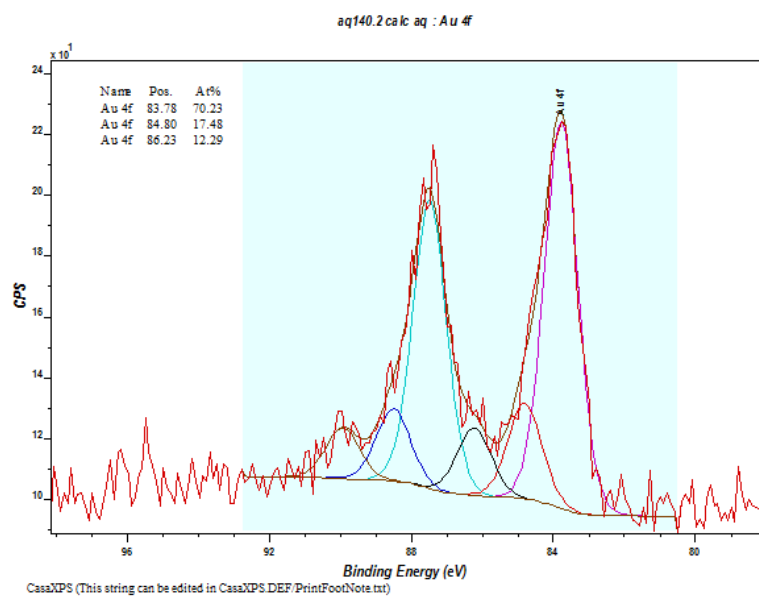

**Fig. S14.** XPS spectrum and simulation for Au/C catalyst after third reduction.



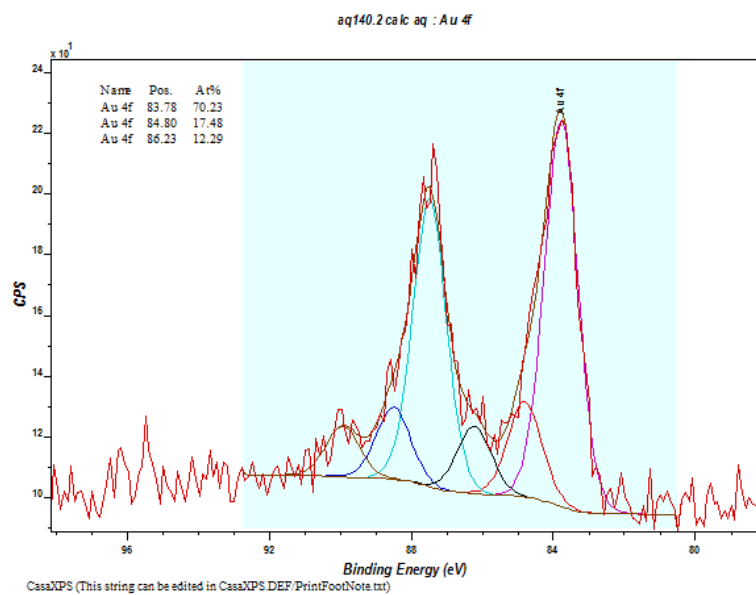

**Fig. S15.** XPS spectrum and simulation for Au/C catalyst after third re-oxidation

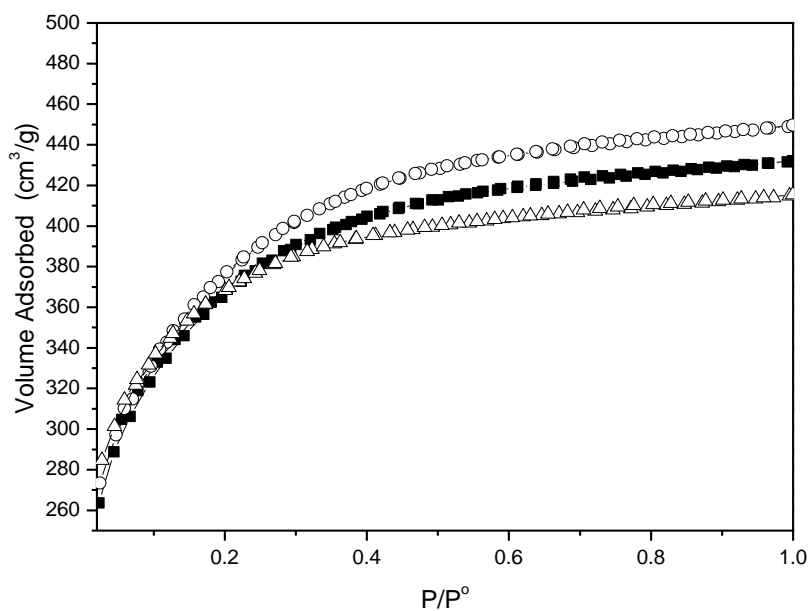

**Fig. S16.** N<sub>2</sub> adsorption isotherms measured at 77K. (Δ) untreated carbon (Norit ROX 0.8), (■) fresh Au/C catalyst and (○) Oxidised Au/C catalyst.

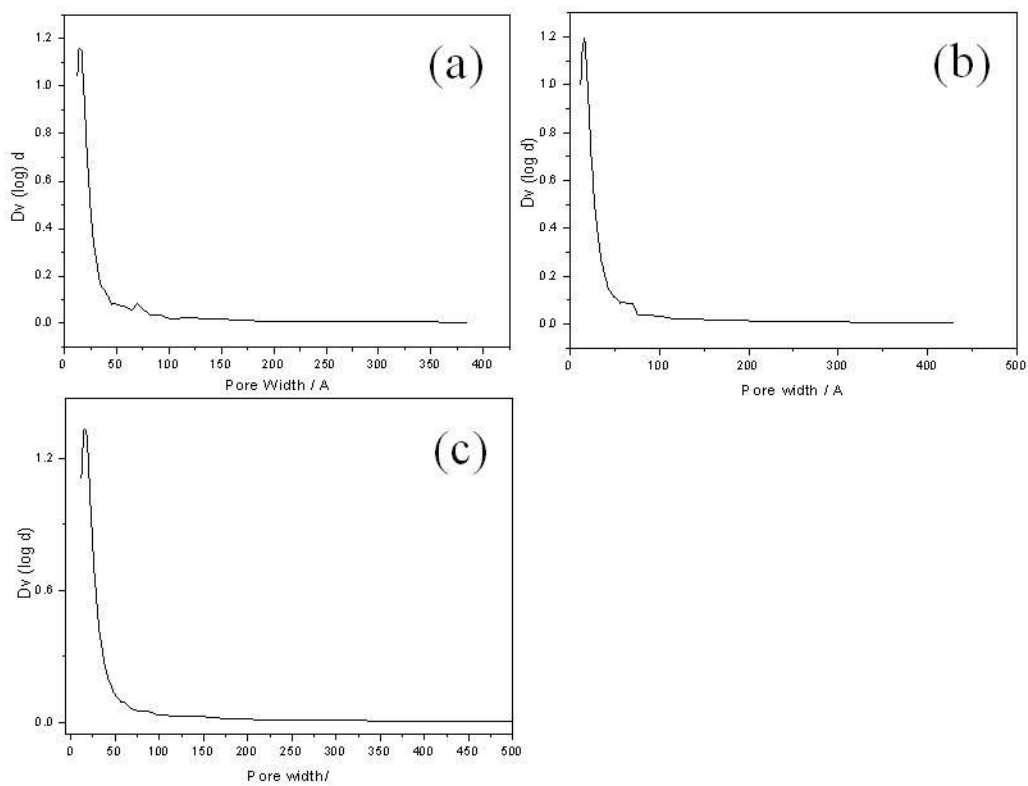

**Fig. S17.** Pore size distribution of (a) untreated carbon (Norit ROX 0.8), (b) fresh Au/C catalyst and (c) Oxidised Au/C catalyst.

**Table S1** Quantification (in mmol) and identification from XPS of Au species over Au/C catalysts subject to reduction and oxidation cycles.

| Catalyst treatment        | Au species (mmol) |                 |                   | Binding energies (eV) |                 |                   |
|---------------------------|-------------------|-----------------|-------------------|-----------------------|-----------------|-------------------|
|                           | Au <sup>3+</sup>  | Au <sup>0</sup> | Au <sup>0-s</sup> | Au <sup>3+</sup>      | Au <sup>0</sup> | Au <sup>0-s</sup> |
| fresh catalyst            | 1.04E-03          | 3.33E-03        | 7.11E-04          | 86.4                  | 83.8            | 84.9              |
| 1 <sup>st</sup> reduction | 0.00E+00          | 4.42E-03        | 6.55E-04          | -                     | 83.9            | 85.4              |
| 1 <sup>st</sup> oxidation | 6.65E-04          | 3.82E-03        | 5.94E-04          | 86.3                  | 83.9            | 85.2              |
| 2 <sup>nd</sup> reduction | 0.00E+00          | 4.54E-03        | 5.38E-04          | -                     | 84              | 85.1              |
| 2 <sup>nd</sup> oxidation | 1.24E-03          | 3.42E-03        | 4.11E-04          | 86.2                  | 83.9            | 85.1              |
| 3 <sup>rd</sup> reduction | 0.00E+00          | 4.57E-03        | 5.08E-04          | -                     | 84              | 85.3              |
| 3 <sup>rd</sup> oxidation | 6.24E-04          | 3.56E-03        | 8.88E-04          | 86.2                  | 83.8            | 84.8              |
